# Supplementary material for: Large-scale antibody immune response mapping of splenic B cells and bone marrow plasma cells in a transgenic mouse model
Source: Front Immunol. 2023 Jun 5;14:1137069. doi: 10.3389/fimmu.2023.1137069 (PMC10280637; doi:10.3389/fimmu.2023.1137069)
Supplement: Supplementary file 10 [file Table_4.xlsx]

## Sheet: Table S4
Table S4. Summary of paired VH:VL amplicon sequencing, yeast library screening, and SPR data for antibodies selected from the bone marrow-derived antibody library.
	Paired VH:VL Sequencing Data												Yeast Screening Data							SPR Data
mAb ID	CDRH3_aa_seqs	CDRL3_aa_seqs	IGHV Gene	IGHJ Gene	CDR-H3 Len	IGKV Gene	IGKJ Gene	CDR-L3 Len	H Isotype	L Isotype	# of Reads in Unique Cluster Library	% of Unique Cluster Library	ER_Rd1	ER_Rd2	ER_0.1_nM	ER_1_nM	ER_10_nM	ER_100_nM	Predicted Affinity	kon (M-1 s-1)	koff (s-1)	KD (M)	Remark
BM-mAb01	CARHDTTWWYFNWYFDLW	CHQSDNLPYTF	IGHV3-11*01	IGHJ2*01	16	IGKV6D-21*02	IGKJ2*01	9	IgG	IgK	227	0.000146296	15.8018	21.7987	369.573	54.7695	15.5902	6.2508	High	380000	2.84963e-05	7.49902e-11	indicative (koff < quantification limit)
BM-mAb02	CARHGSSHWYFDWYFDLW	CHQSDNIPYTF	IGHV3-11*01	IGHJ2*01	16	IGKV6D-21*02	IGKJ2*01	9	IgG	IgK	851	0.000548449	8.45381	7.90483	227.229	21.608	8.56434	5.77571	High	230000	2.84963e-05	1.23897e-10	indicative (koff < quantification limit)
BM-mAb03	CAGTSHDVLADYYPDVFDIW	CQQYDNWPPITF	IGHV3-33*01	IGHJ3*02	18	IGKV3-15*01	IGKJ5*01	10	IgG	IgK	730	0.000470467	8.76133	10.4401	0	39.7834	13.5209	9.34314	Medium	190000	3.6e-05	1.89474e-10
BM-mAb04	CARHSSSYWYFNWYFDLW	CHQSDNLPYTF	IGHV3-11*01	IGHJ2*01	16	IGKV6D-21*02	IGKJ2*01	9	IgG	IgK	727	0.000468534	8.59436	6.94891	86.6573	13.0889	6.24502	3.0547	High	320000	9.60238e-05	3.00074e-10	indicative (koff < quantification limit)
BM-mAb05	CAREGDFYGSGRYYPHYYGMDVW	CQQVNSYPYTF	IGHV4-59*01	IGHJ6*02	21	IGKV1-9*01	IGKJ2*01	9	IgG	IgK	2255	0.00145329	8.71897	6.75102	0.00640824	6.50101	6.50383	5.38868	Medium	91000	2.84963e-05	3.13146e-10	indicative (koff < quantification limit)
BM-mAb06	CARHDTSWWYLNWYFDRW	CHQSDNLPYTF	IGHV3-11*01	IGHJ2*01	16	IGKV6D-21*02	IGKJ2*01	9	IgG	IgK	423	0.000272613	9.14383	15.174	202.262	41.6883	13.0591	7.80086	High	310000	0.0001	3.22581e-10
BM-mAb07	CARHSTSWWYLNWYFDRW	CHQSDNLPYTF	IGHV3-11*01	IGHJ2*01	16	IGKV6D-21*02	IGKJ2*01	9	IgG	IgK	734	0.000473045	12.6759	12.4092	17.4897	14.3022	3.64851	4.35981	High	240000	0.00011	4.58333e-10
BM-mAb08	CAREGDYYGSGNYYPHYYGMDVW	CQQLNSYPYTF	IGHV4-59*01	IGHJ6*02	21	IGKV1-9*01	IGKJ2*01	9	IgG	IgK	5418	0.00349177	10.1811	10.0873	1.73705	10.5957	8.57452	6.78059	Medium	47000	2.84963e-05	6.06304e-10	indicative (koff < quantification limit)
BM-mAb09	CARHSTSHWYVVWYFDLW	CHQSDNLPYTF	IGHV3-11*01	IGHJ2*01	16	IGKV6D-21*02	IGKJ2*01	9	IgG	IgK	1885	0.00121484	6.39211	5.11108	8.69466	9.43724	2.51892	2.34799	Medium	210000	0.00018	8.57143e-10
BM-mAb10	CAREGDYYGSGRYYPHYYGMDVW	CQQLNSYPYTF	IGHV4-59*01	IGHJ6*02	21	IGKV1-9*01	IGKJ2*01	9	IgG	IgK	6960	0.00448555	7.39273	6.79937	0.531713	15.0061	20.4428	17.8667	Medium	25000	0.0001	4e-09
BM-mAb11	CVREDRYCYNSNCFAYFDYW	CHQDYDLPLTF	IGHV3-33*01	IGHJ4*02	18	IGKV3-7*02	IGKJ4*01	9	IgG	IgK	2231	0.00143783	8.60043	7.64505	10.566	10.7155	8.0991	7.18359	Medium	12000	0.00015	1.25e-08
BM-mAb12	CAREVRHFDWSLFDYW	CLQDYNYTF	IGHV3-33*01	IGHJ4*02	14	IGKV1-6*01	IGKJ4*01	7	IgG	IgK	315	0.00020301	4.84529	5.19599	0	0	6.38146	5.78156	Medium	5500	0.00013	2.36364e-08
BM-mAb13	CARDPPRTAEAGTVYSYGMDVW	CQQDYNLPFTF	IGHV3-33*01	IGHJ6*02	20	IGKV3-7*02	IGKJ2*01	9	IgG	IgK	732	0.000471756	8.65328	17.8375	0	45.7227	23.1938	26.5736	Medium	13000	0.00031	2.38462e-08
BM-mAb14	CARGPVYCSDGSCYRYFDLW	CQQYYNLWTF	IGHV3-33*01	IGHJ2*01	18	IGKV3-7*02	IGKJ1*01	8	IgG	IgK	1506	0.00097058	5.5446	8.15989	0.00555922	13.3053	10.7276	8.92119	Medium	10000	0.00037	3.7e-08
BM-mAb15	CARDERYCSGGSCYRWFDPW	CQQDYDLPYTF	IGHV3-30*03	IGHJ5*02	18	IGKV3-7*02	IGKJ2*01	9	IgG	IgK	658	0.000424065	8.57117	10.0122	0.0288227	34.1102	11.4901	9.96747	Medium	14000	0.00052	3.71429e-08
BM-mAb16	CARDFPRYCSGGRCYYYGMDVW	CQQFNDYPYTF	IGHV3-33*01	IGHJ6*02	20	IGKV1D-13*01	IGKJ2*01	9	IgG	IgK	2454	0.00158154	4.95902	6.75213	0.00357667	16.823	9.98083	7.58451	Medium	5700	0.00022	3.85965e-08
BM-mAb17	CARYGDRYCSGGSCYSEAFDIW	CQQDYNLYTF	IGHV3-33*01	IGHJ3*02	20	IGKV3-7*02	IGKJ2*01	8	IgG	IgK	739	0.000476268	4.13271	7.2048	0.0786722	26.4713	9.78502	5.91774	Medium	6300	0.00029	4.60317e-08
BM-mAb18	CARDQRYCSGGSCYDYFDYW	CQQDYNLPYTF	IGHV3-30*03	IGHJ4*02	18	IGKV3-7*02	IGKJ2*01	9	IgG	IgK	3279	0.00211324	8.16394	11.4171	65.9495	31.7944	14.3085	11.9648	High	6400	0.00021	3.28125e-08	Indicative (complex interaction)
BM-mAb19	CARETKYCSGGNCYHYFDYW	CQQDYDLPYTF	IGHV3-33*05	IGHJ4*02	18	IGKV3-7*02	IGKJ2*01	9	IgG	IgK	2	1.28895e-06	27.0175	38.9868	132.866	159.713	39.3242	31.5166	Medium	19000	0.00047	2.47368e-08	Indicative (complex interaction)
BM-mAb20	CAREDRYCFSSNCFAYFDYW	CQQDYDLPLTF	IGHV3-33*01	IGHJ4*02	18	IGKV3-7*02	IGKJ4*01	9	IgG	IgK	271	0.000174653	4.36607	7.01461	0	28.5	8.00985	6.69732	Medium	6300	0.00022	3.49206e-08	Indicative (complex interaction)
BM-mAb21	CARDISYCSGGSCYSYFDYW	CQQDYNLPYTF	IGHV3-33*01	IGHJ4*02	18	IGKV3-7*02	IGKJ2*01	9	IgG	IgK	841	0.000542004	5.13368	10.4954	0	26.3739	15.6334	10.5478	Medium	22000	0.00072	3.27273e-08	Indicative (complex interaction)
BM-mAb22	CAREGYFDWLSQGFDPW	CHQSSSLPHAF	IGHV1-46*01	IGHJ5*02	15	IGKV6D-21*02	IGKJ2*01	9	IgG	IgK	2225	0.00143396	7.87721	7.62909	1.28513	8.18791	5.18391	4.22751	Medium	110000	0.00018	1.63636e-09	Indicative (complex interaction)
BM-mAb23	CAKDDDYYISGSSFYYYHYYGMDVW	CTQGTHFPHTF	IGHV3-23*01	IGHJ6*02	23	IGKV2D-24*01	IGKJ4*01	9	IgG	IgK	610	0.00039313	15.8756	10.6993	0	0.290242	2.57095	2.38983	Medium	130000	0.0012	9.23077e-09	Indicative (complex interaction)
BM-mAb24	CTTVYYYGSGTYYNEDAFDIW	CHQSSSLPLTF	IGHV3-33*01	IGHJ3*02	19	IGKV6D-21*02	IGKJ4*01	9	IgG	IgK	330	0.000212677	2.00057	5.01681	0.0441287	0	1.01982	2.88214	Low	35000	0.0012	3.42857e-08	Indicative (complex interaction)
BM-mAb25	CARDPPRYCSGGSCYSSGMDVW	CQQDYNLWTF	IGHV3-33*01	IGHJ6*02	20	IGKV3-7*02	IGKJ1*01	8	IgG	IgK	602	0.000387974	4.55216	6.56713	0	11.8738	6.77401	4.23146	Medium	3600	0.00026	7.22222e-08
BM-mAb26	CARDPVGYCSGGSCYYNGMDVW	CQQYGSSPTF	IGHV3-33*01	IGHJ6*02	20	IGKV3-20*01	IGKJ4*01	8	IgG	IgK	4725	0.00304515	4.87626	5.27621	0.00373609	0.271679	5.06654	5.29213	Low	3300	0.00031	9.39394e-08
BM-mAb27	CAREEYYGSGGFDYW	CQQLNSYPYTF	IGHV3-33*01	IGHJ4*02	13	IGKV1-9*01	IGKJ2*01	9	IgG	IgK	2787	0.00179615	4.26051	5.9241	0.00501856	3.55656	4.84697	6.84752	Low	75000	0.0071	9.46667e-08
BM-mAb28	CARDQKFCSGGNCFNYFDYW	CQQAYNLPYTF	IGHV3-33*01	IGHJ4*02	18	IGKV3-7*02	IGKJ2*01	9	IgG	IgK	1559	0.00100474	4.84664	6.76937	0.0200899	15.3458	10.2287	8.56244	Medium	5500	0.00057	1.03636e-07
BM-mAb29	CAREEGYCSGGNCYRWFDPW	CQQHYNLPFTF	IGHV3-30*03	IGHJ5*02	18	IGKV3-7*02	IGKJ2*01	9	IgG	IgK	374	0.000241034	9.4372	24.7356	553.87	175.877	39.146	28.1516	High	8700	0.0011	1.26437e-07
BM-mAb30	CARGGEKYCSGGSCYYYGMDVW	CQQDYNLPYTF	IGHV3-33*01	IGHJ6*02	20	IGKV3-7*02	IGKJ2*01	9	IgG	IgK	508	0.000327394	2.97212	7.01817	7.88809	27.1345	13.9127	13.132	Medium	3200	0.00072	2.25e-07
BM-mAb31	CARHSTSSWYVDWYFDLW	CHQSDNLPYTF	IGHV3-11*01	IGHJ2*01	16	IGKV6D-21*02	IGKJ2*01	9	IgG	IgK	709	0.000456933	6.40477	7.70665	0.0372014	32.0402	9.33161	4.90614	Medium	25000	0.0059	2.36e-07
BM-mAb32	CARGDYYGWSSDYW	CQQLNSYPLTF	IGHV3-33*01	IGHJ4*02	12	IGKV1-9*01	IGKJ4*01	9	IgG	IgK	10415	0.00671221	6.57861	9.395	0.0080398	8.79108	14.9463	12.0421	Medium	190000	0.06	3.15789e-07
BM-mAb33	CARVGTLGIGIDYW	CLQDYNYPWTF	IGHV3-33*01	IGHJ4*02	12	IGKV1-6*01	IGKJ1*01	9	IgG	IgK	4910	0.00316438	3.53318	5.44864	0.00162526	0.254133	7.11996	7.30461	Low	100000	0.047	4.7e-07
BM-mAb34	CAKYFRYCSGGSCYSGFDYW	CQQDYNLPLTF	IGHV3-33*06	IGHJ4*02	18	IGKV3-7*02	IGKJ4*01	9	IgG	IgK	523	0.000337061	7.47184	7.84996	0	25.6243	8.65396	6.96519	Medium	4900	0.003	6.12245e-07
BM-mAb35	CARDQRYCTSGNCLDYFDYW	CQQDYNLPFTF	IGHV3-33*01	IGHJ4*02	18	IGKV3-7*02	IGKJ3*01	9	IgG	IgK	150	9.66713e-05	11.6757	46.9564	683.133	566.541	375.406	428.883	High	5600	0.00077	1.375e-07	Indicative (complex interaction)
BM-mAb36	CARETRYCSGGSCYHYFDYW	CQQDYNLPYTF	IGHV3-33*05	IGHJ4*02	18	IGKV3-7*02	IGKJ2*01	9	IgG	IgK	567	0.000365418	5.78949	9.28448	118.271	27.845	12.3631	11.7662	High	5700	0.0007	1.22807e-07	Indicative (complex interaction)
BM-mAb37	CARDSRYCSGGNCYQYFDYW	CQQDYNLPFTF	IGHV3-33*01	IGHJ4*02	18	IGKV3-7*02	IGKJ4*01	9	IgG	IgK	572	0.00036864	5.80486	7.24635	60.1771	20.0132	7.26902	5.40429	High	7400	0.00043	5.81081e-08	Indicative (complex interaction)
BM-mAb38	CSRDEGYCSGGNCYRWFDPW	CQQHYDLPFTF	IGHV3-30*03	IGHJ5*02	18	IGKV3-7*02	IGKJ2*01	9	IgG	IgK	17	1.09561e-05	7.67988	10.797	56.1554	26.976	17.1508	12.1551	High	13000	0.00062	4.76923e-08	Indicative (complex interaction)
BM-mAb39	CARHQRYCSGGSCYSNFDYW	CQQDYNLPPTF	IGHV3-33*01	IGHJ4*02	18	IGKV3-7*02	IGKJ1*01	9	IgG	IgK	3029	0.00195212	6.34516	9.03431	42.8391	26.4765	10.6743	8.27899	High	5900	0.00035	5.9322e-08	Indicative (complex interaction)
BM-mAb40	CVRDRGISMERGVIITDAFDIW	CHQEYNLPFTF	IGHV3-33*01	IGHJ3*02	20	IGKV3-7*02	IGKJ3*01	9	IgG	IgK	28	1.80453e-05	28.0586	46.4752	0.799832	166.922	64.3095	24.7799	Medium	5900	0.00067	1.13559e-07	Indicative (complex interaction)
BM-mAb41	CARDLRYCSGGSCYNWFDPW	CQQYGSSPMYTF	IGHV3-33*05	IGHJ5*02	18	IGKV3-20*01	IGKJ2*01	10	IgG	IgK	78	5.02691e-05	15.0567	29.4209	0	82.1395	37.2148	42.0054	Medium	9100	0.00052	5.71429e-08	Indicative (complex interaction)
BM-mAb42	CARERIAMFRGNRYYGMDVW	CQQDYNLPFTF	IGHV3-30*03	IGHJ6*02	18	IGKV3-7*02	IGKJ3*01	9	IgG	IgK	976	0.000629008	6.12376	11.5935	0	33.074	16.7196	12.4739	Medium	6400	0.00033	5.15625e-08	Indicative (complex interaction)
BM-mAb43	CARDQRYCSGGNCLHYFDYW	CQQDYNLPYTF	IGHV3-30*04	IGHJ4*02	18	IGKV3-7*02	IGKJ2*01	9	IgG	IgK	6415	0.00413431	6.87864	7.78928	3.30344	20.2374	9.71439	7.15833	Medium	11000	0.00054	4.90909e-08	Indicative (complex interaction)
BM-mAb44	CVRYFRYCTGGSCYSGFDWW	CQQDYNLPLTF	IGHV3-33*01	IGHJ4*02	18	IGKV3-7*02	IGKJ4*01	9	IgG	IgK	1098	0.000707634	7.50189	7.24037	0	20.1879	7.97031	6.3725	Medium	7200	0.0005	6.94444e-08	Indicative (complex interaction)
BM-mAb45	CARDLRYCSGGSCYSGEDVW	CQQDYNLPWTF	IGHV3-33*05	IGHJ6*02	18	IGKV3-7*02	IGKJ1*01	9	IgG	IgK	1579	0.00101763	6.51431	7.44706	1.96032	15.6056	9.42974	7.20873	Medium	3600	0.0011	3.05556e-07	Indicative (complex interaction)
BM-mAb46	CVRDLMRYCSGGSCYGYGMDVW	CQQDYNLPLTF	IGHV3-33*01	IGHJ6*02	20	IGKV3-7*02	IGKJ4*01	9	IgG	IgK	1315	0.000847485	3.80673	8.47739	0	14.1578	12.0792	10.292	Medium	8300	0.00064	7.71084e-08	Indicative (complex interaction)
BM-mAb47	CARDPPRVAAAGIVYSYGLDVW	CQQDYNLPYTF	IGHV3-33*01	IGHJ6*02	20	IGKV3-7*02	IGKJ2*01	9	IgG	IgK	395	0.000254568	2.1648	5.66992	0	13.6084	10.7595	4.43821	Medium	6600	0.00051	7.72727e-08	Indicative (complex interaction)
BM-mAb48	CARYERYCSGGSCYSNFDYW	CQQDYNLPPTF	IGHV3-33*01	IGHJ4*02	18	IGKV3-7*02	IGKJ1*01	9	IgG	IgK	2239	0.00144298	5.7665	6.97356	0.00548773	12.2346	8.64237	8.05747	Medium	74	0.0031	4.18919e-05	Indicative (complex interaction)
BM-mAb49	CVRDRGKYCSGGICSSGAFDIW	CQQDYNLPFTF	IGHV3-33*01	IGHJ3*02	20	IGKV3-7*02	IGKJ3*01	9	IgG	IgK	1063	0.000685078	4.10568	5.29863	0.0710962	7.26185	9.96092	6.19127	Medium	7200	0.00067	9.30556e-08	Indicative (complex interaction)
BM-mAb50	CARDSPRYCSSGSCYWDGMDVW	CQQYDSSPLTF	IGHV3-33*01	IGHJ6*02	20	IGKV3-20*01	IGKJ4*01	9	IgG	IgK	276	0.000177875	25.1215	44.1377	1511.46	118.737	50.7409	37.6098	High	no binding
BM-mAb51	CVRDDWPDAFDIW	CLQHNSYPYTF	IGHV3-20*01	IGHJ3*02	11	IGKV1-17*01	IGKJ2*01	9	IgG	IgK	496	0.00031966	8.84614	8.69762	181.458	24.2646	7.11014	4.92106	High	no binding
BM-mAb52	CARHSSTHWYVDWYFDLW	CHQSDNLPYTF	IGHV3-11*01	IGHJ2*01	16	IGKV6D-21*02	IGKJ2*01	9	IgG	IgK	1469	0.000946735	8.57198	7.08867	125.033	28.0708	10.2391	11.1578	High	no binding
BM-mAb53	CARHSSSHWYFDWYFDRW	CHQSDYLPYTF	IGHV3-11*01	IGHJ2*01	16	IGKV6D-21*02	IGKJ2*01	9	IgG	IgK	1365	0.000879709	12.7986	12.8828	92.8461	39.9154	13.0521	10.2236	High	no binding
BM-mAb54	CARDPPRTAAAGTVYSYGLDVW	CQQDYNLPFTF	IGHV3-33*01	IGHJ6*02	20	IGKV3-7*02	IGKJ2*01	9	IgG	IgK	3880	0.00250057	10.0036	16.8185	0.0200167	45.783	23.5277	17.2747	Medium	no binding
BM-mAb55	CARDTDDILTGYYYGMDVW	CQQDYNLPYTF	IGHV3-33*01	IGHJ6*02	17	IGKV3-7*02	IGKJ2*01	9	IgG	IgK	774	0.000498824	10.4411	16.902	0.0499897	41.4049	18.4842	15.1945	Medium	no binding
BM-mAb56	CARETRYCSGGTCYRYFDNW	CQQDYDLPYTF	IGHV3-33*05	IGHJ4*02	18	IGKV3-7*02	IGKJ2*01	9	IgG	IgK	1010	0.00065092	7.42666	14.4075	10.1213	32.9498	22.8476	14.5498	Medium	no binding
BM-mAb57	CAREERYCSGGKCYRWFDPW	CQQDYDLPYTF	IGHV3-30*03	IGHJ5*02	18	IGKV3-7*02	IGKJ2*01	9	IgG	IgK	92	5.92918e-05	13.9094	9.99104	0	31.0421	10.4401	9.67386	Medium	no binding
BM-mAb58	CARDPYRYCSGGSCYDHGMDVW	CQQDYNLPLTF	IGHV3-33*01	IGHJ6*02	20	IGKV3-7*02	IGKJ4*01	9	IgG	IgK	302	0.000194632	8.79458	14.0099	0	28.1329	16.9233	14.359	Medium	no binding
BM-mAb59	CARHSSSHWYADWYFDLW	CHQSDNVPYTF	IGHV3-11*01	IGHJ2*01	16	IGKV6D-21*02	IGKJ2*01	9	IgG	IgK	787	0.000507202	12.7606	8.3784	12.7583	27.601	9.41115	8.08579	Medium	no binding
BM-mAb60	CAREDRYCISGSCYAFLDSW	CQQDYNLPFTF	IGHV3-33*01	IGHJ4*02	18	IGKV3-7*02	IGKJ2*01	9	IgG	IgK	4055	0.00261335	4.52639	7.31495	5.93418	25.2626	13.2884	10.0214	Medium	no binding
BM-mAb61	CARERGRYCSGGSCYGHYGMDVW	CLQDYNYPYTF	IGHV3-33*01	IGHJ6*02	21	IGKV1-6*01	IGKJ2*01	9	IgG	IgK	751	0.000484001	6.19941	8.51004	0.0171316	15.9323	11.7413	8.72172	Medium	no binding
BM-mAb62	CARDQKYCSGGICYDYFDYW	CQQDYDLPFTF	IGHV3-30*03	IGHJ4*02	18	IGKV3-7*02	IGKJ2*01	9	IgG	IgK	231	0.000148874	11.2234	10.6473	0	12.8789	12.619	5.40935	Medium	no binding
BM-mAb63	CARSRIAMVRGVVLNDAFDIW	CQQDYNLPITF	IGHV3-33*01	IGHJ3*02	19	IGKV3-7*02	IGKJ5*01	9	IgG	IgK	205	0.000132118	7.19858	6.65965	0	6.87546	4.12206	5.62195	Medium	no binding
BM-mAb64	CAREGRYCSGGNCYSYFDLW	CQQDYDLPFTF	IGHV3-33*01	IGHJ2*01	18	IGKV3-7*02	IGKJ3*01	9	IgG	IgK	1517	0.00097767	3.75276	7.42822	2.46764	5.0937	10.2091	8.80024	Medium	no binding
BM-mAb65	CARDPPRIAAAGTVYYYGMDVW	CRQDYDLPYTF	IGHV3-33*01	IGHJ6*02	20	IGKV3-7*02	IGKJ2*01	9	IgG	IgK	372	0.000239745	4.3985	6.25341	0	0.721937	7.68553	7.13438	Medium	no binding
BM-mAb66	CAREDISYCSGGNCYYFGLDVW	CQQYGSSPYTF	IGHV3-33*01	IGHJ6*02	20	IGKV3-20*01	IGKJ2*01	9	IgG	IgK	1407	0.000906777	4.76661	5.7717	0	3.46613	6.62133	5.93891	Medium	no binding
BM-mAb67	CARDRGKYCSGGSCYSGAFDIW	CQQDYNLPFTF	IGHV3-33*01	IGHJ3*02	20	IGKV3-7*02	IGKJ3*01	9	IgG	IgK	4426	0.00285245	4.26857	5.01103	0	5.23264	5.92966	4.74284	Medium	no binding
BM-mAb68	CARVPPFTLVRGVGDYYGMDVW	CQQDYNLPITF	IGHV3-33*01	IGHJ6*02	20	IGKV3-7*02	IGKJ5*01	9	IgG	IgK	2621	0.00168917	5.29801	10.5471	0.007226	0.804136	11.9836	15.3595	Low	no binding
BM-mAb69	CAREAIAYCSGGSCYYYGMDVW	CQQYGSSPYTF	IGHV3-33*01	IGHJ6*02	20	IGKV3-20*01	IGKJ2*01	9	IgG	IgK	2126	0.00137016	4.45116	5.68288	0.0060025	0.6623	7.16132	7.39341	Low	no binding
BM-mAb70	CARLVRYCSGGNCYRYFDYW	CLQDYNYPYTF	IGHV3-33*01	IGHJ4*02	18	IGKV1-6*01	IGKJ2*01	9	IgG	IgK	3933	0.00253472	6.60205	9.03355	0	4.53867	6.90894	6.93369	Low	no binding
BM-mAb71	CARDPVADCSGGSCYYYGMDVW	CQQYGSSRTF	IGHV3-33*01	IGHJ6*02	20	IGKV3-20*01	IGKJ4*01	8	IgG	IgK	449	0.00028937	4.13478	6.29424	0	0	4.804	6.7948	Low	no binding
BM-mAb72	CARGDDILIGPYYGMDVW	CQQRSNWPLTF	IGHV3-33*01	IGHJ6*02	16	IGKV3-11*01	IGKJ4*01	9	IgG	IgK	5888	0.00379467	4.35183	5.91095	0.0229513	0.631052	4.92834	4.99991	Low	No expression
